# Supplementary material for: Transcriptome and Resequencing Analyses Provide Insight into Differences in Organic Acid Accumulation in Two Pear Varieties
Source: MDPI journal article supplement (doi:10.3390/ijms22179622), 2021-09-06

**Module membership vs. gene significance**  
**cor=0.71, p=1.9e-16**

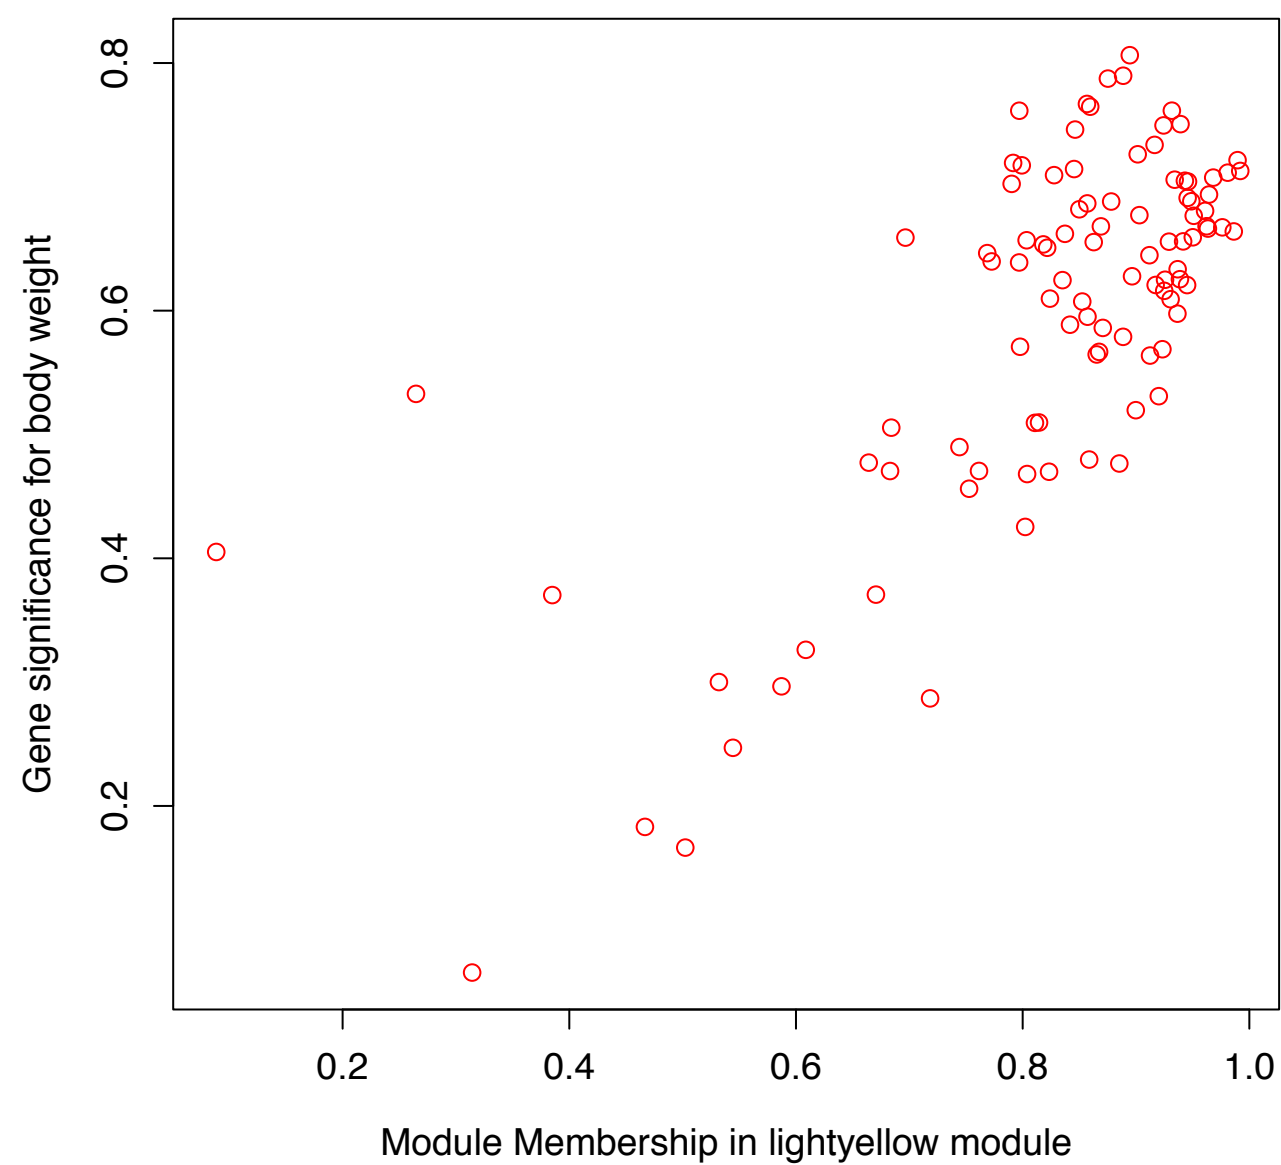

**Module membership vs. gene significance**  
**cor=0.64, p=9.9e-13**

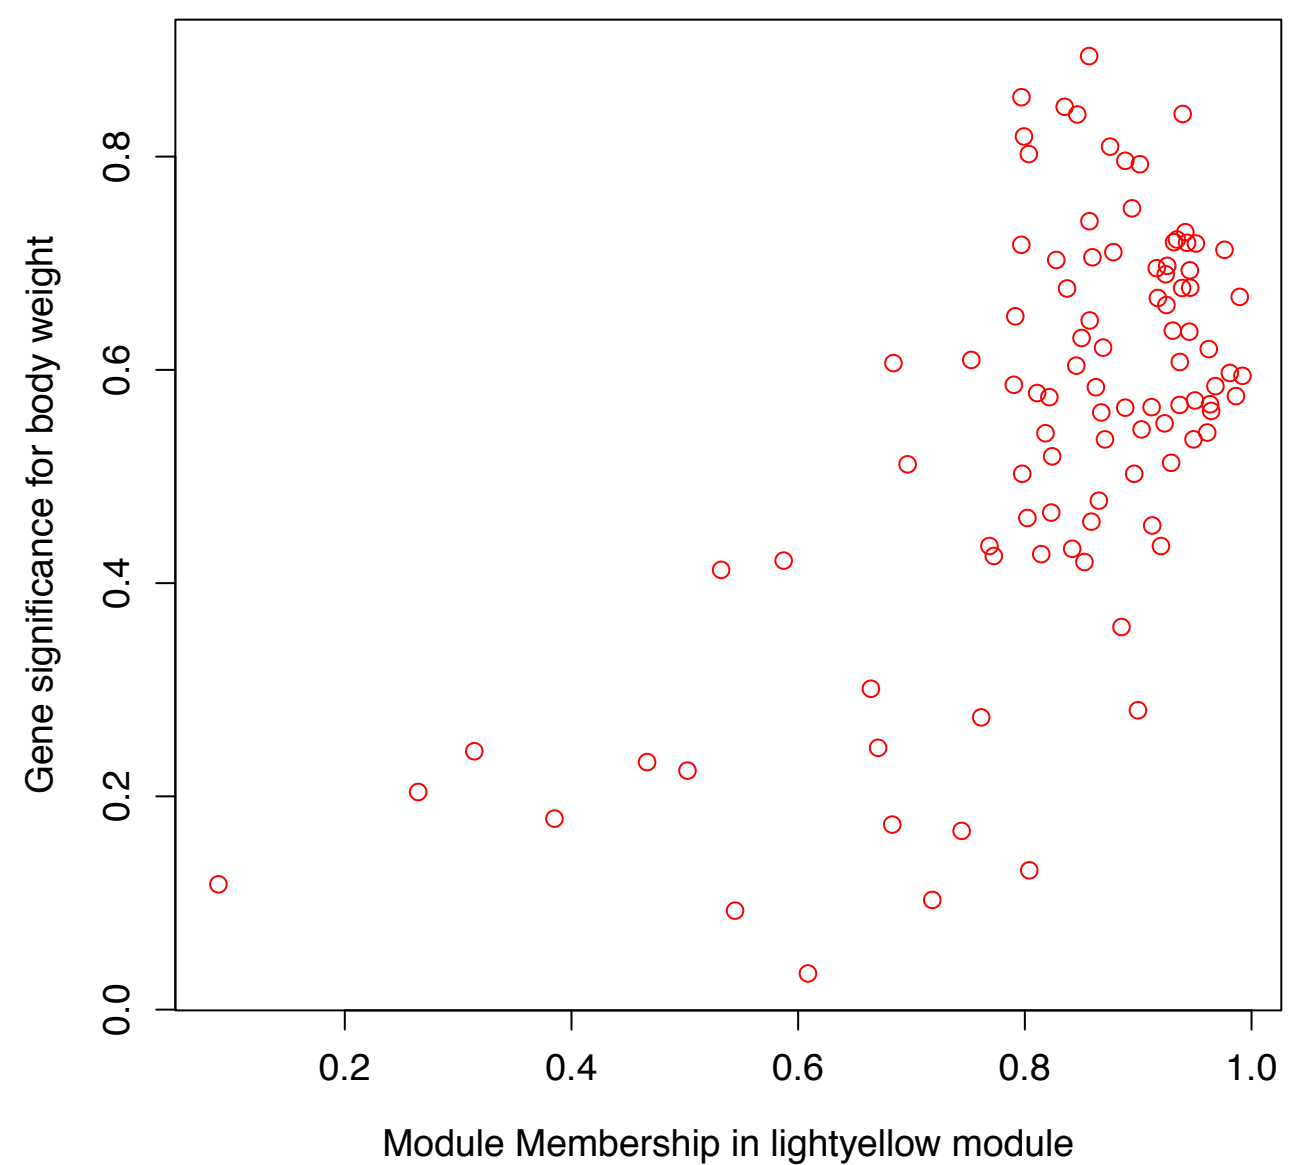

**Module membership vs. gene significance**  
**cor=0.65, p<1e-200**

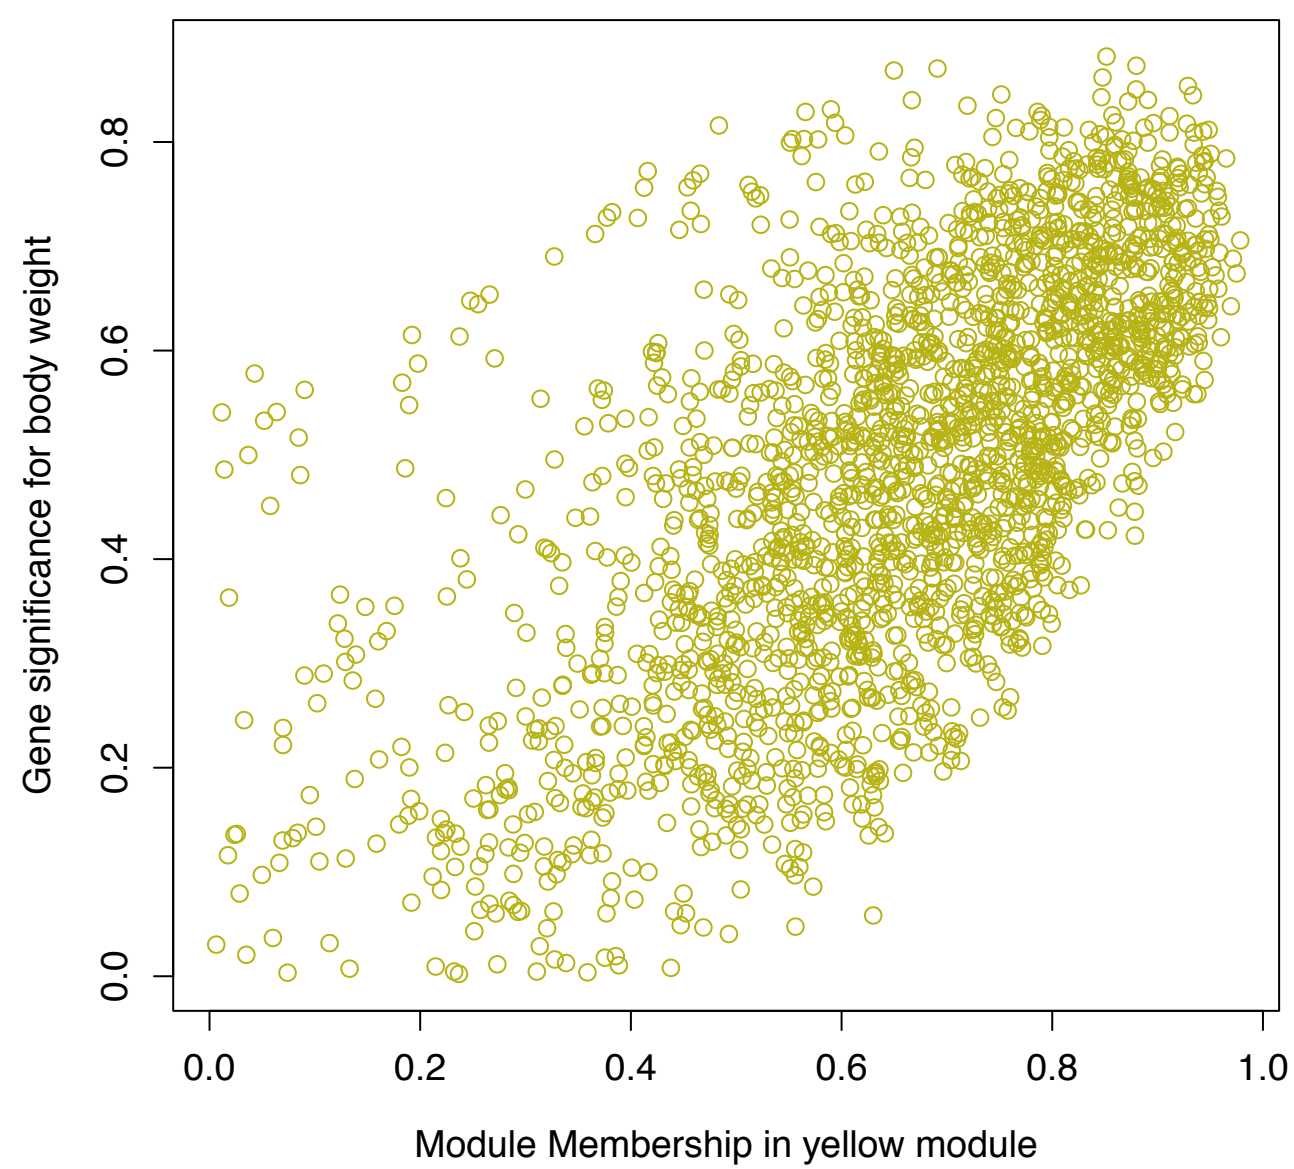

**Module membership vs. gene significance**  
**cor=0.63, p<1e-200**

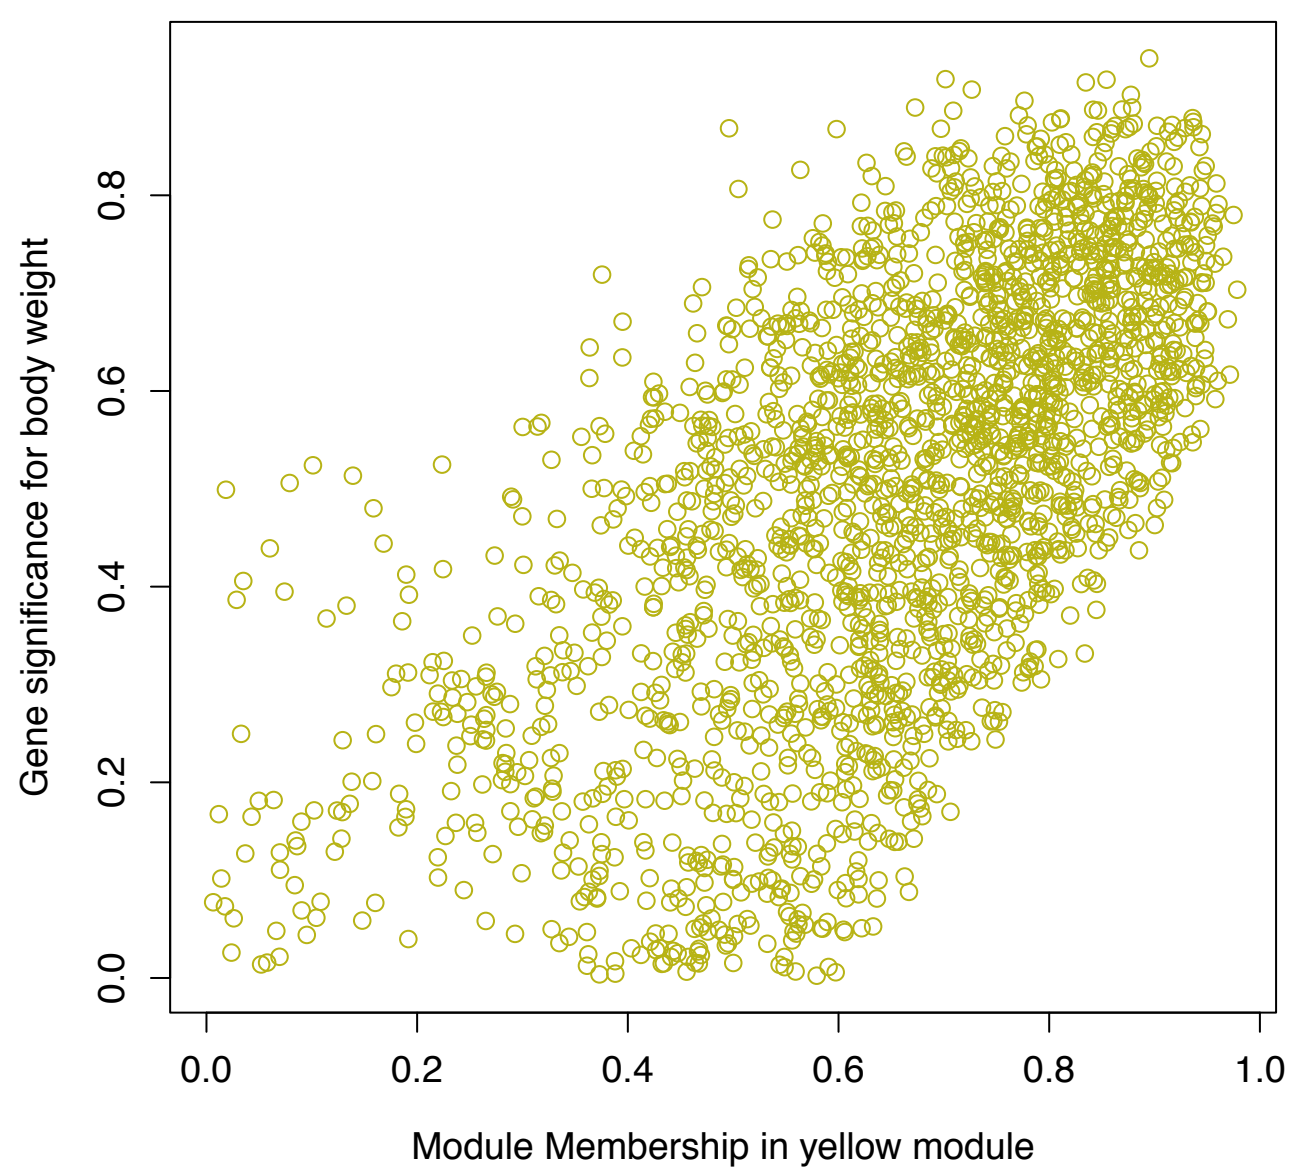

**Module membership vs. gene significance**  
**cor=0.59, p<1e-200**

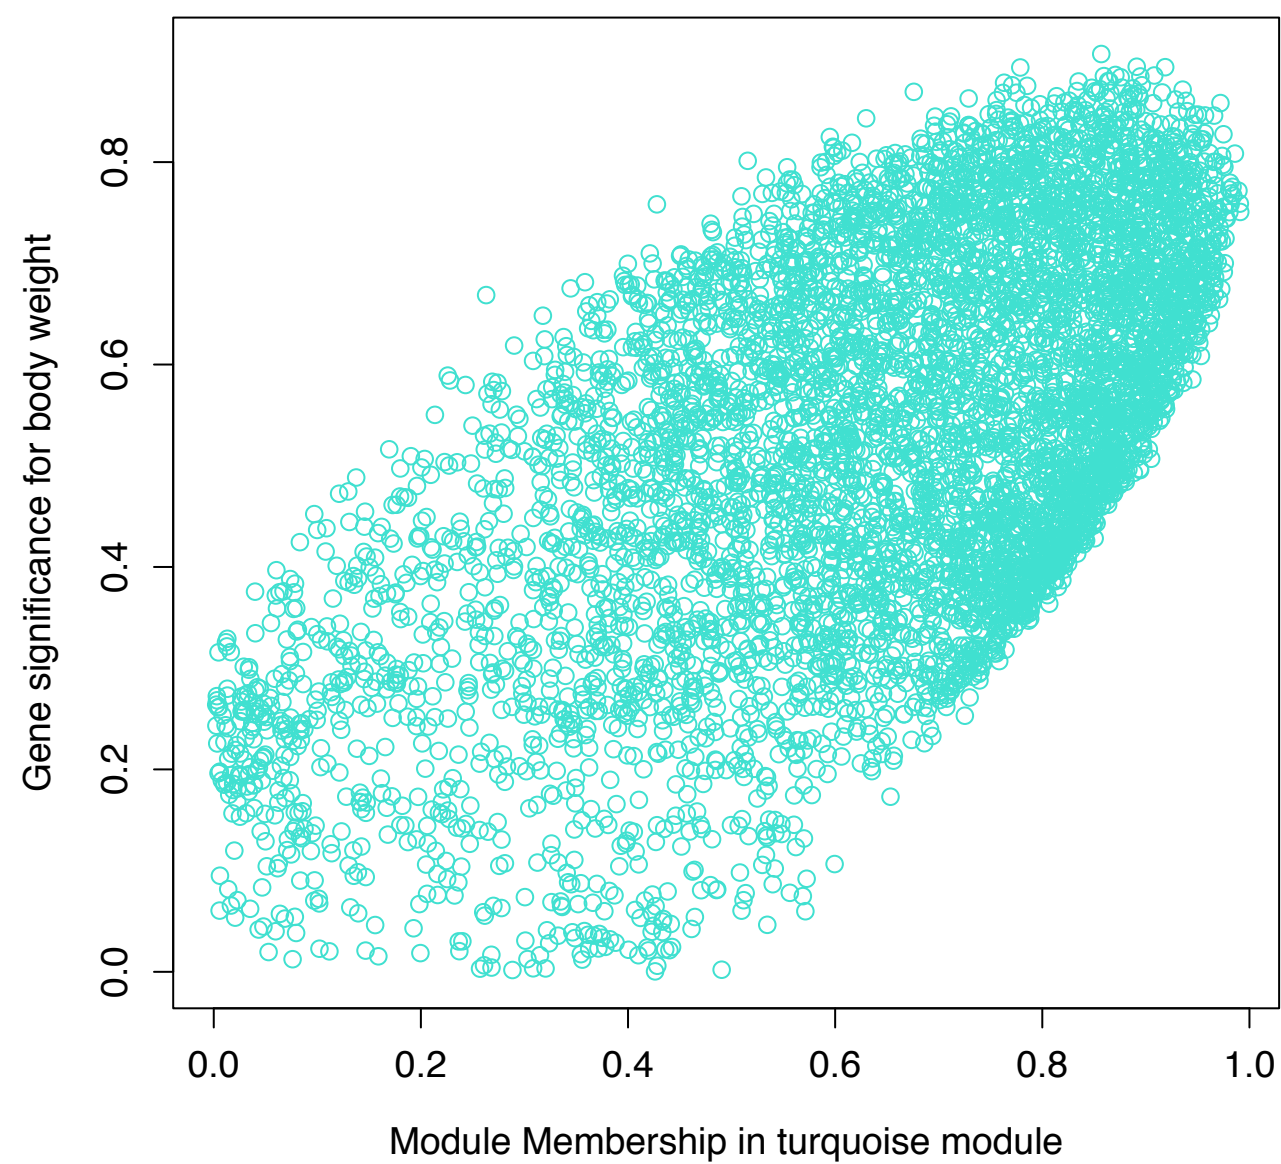

Supplement: s1 [file s1]
