# Supplementary figures and images for: Transcriptome and Resequencing Analyses Provide Insight into Differences in Organic Acid Accumulation in Two Pear Varieties
Source: MDPI journal article supplement (doi:10.3390/ijms22179622), 2021-09-06

Correlation coefficient

|         |      |      |      |      |      |      |      |      |      |      |      |      |      |      |      |      |      |      |      |      |      |      |      |      |
|---------|------|------|------|------|------|------|------|------|------|------|------|------|------|------|------|------|------|------|------|------|------|------|------|------|
| a-120-1 | 1    | 1    | 1    | 0.26 | 0.25 | 0.23 | 0.45 | 0.29 | 0.28 | 0.69 | 0.96 | 0.54 | 0.6  | 0.66 | 0.59 | 0.23 | 0.23 | 0.22 | 0.29 | 0.3  | 0.29 | 0.51 | 0.48 | 0.34 |
| a-120-2 | 1    | 1    | 1    | 0.26 | 0.26 | 0.24 | 0.46 | 0.3  | 0.29 | 0.7  | 0.96 | 0.55 | 0.61 | 0.67 | 0.6  | 0.24 | 0.24 | 0.23 | 0.31 | 0.31 | 0.3  | 0.52 | 0.48 | 0.35 |
| a-120-3 | 1    | 1    | 1    | 0.22 | 0.21 | 0.19 | 0.43 | 0.27 | 0.26 | 0.66 | 0.95 | 0.5  | 0.6  | 0.65 | 0.58 | 0.2  | 0.2  | 0.19 | 0.27 | 0.28 | 0.26 | 0.49 | 0.45 | 0.31 |
| a-15-1  | 0.26 | 0.26 | 0.22 | 1    | 0.99 | 0.97 | 0.63 | 0.67 | 0.66 | 0.71 | 0.38 | 0.81 | 0.32 | 0.32 | 0.34 | 0.83 | 0.87 | 0.83 | 0.78 | 0.74 | 0.77 | 0.71 | 0.73 | 0.78 |
| a-15-2  | 0.25 | 0.26 | 0.21 | 0.99 | 1    | 0.98 | 0.63 | 0.67 | 0.65 | 0.72 | 0.38 | 0.81 | 0.32 | 0.32 | 0.33 | 0.83 | 0.86 | 0.82 | 0.78 | 0.74 | 0.77 | 0.72 | 0.74 | 0.78 |
| a-15-3  | 0.23 | 0.24 | 0.19 | 0.97 | 0.98 | 1    | 0.6  | 0.63 | 0.64 | 0.73 | 0.38 | 0.78 | 0.33 | 0.3  | 0.31 | 0.84 | 0.86 | 0.84 | 0.78 | 0.75 | 0.79 | 0.73 | 0.71 | 0.75 |
| a-45-1  | 0.45 | 0.46 | 0.43 | 0.63 | 0.63 | 0.6  | 1    | 0.98 | 0.98 | 0.6  | 0.49 | 0.62 | 0.49 | 0.51 | 0.51 | 0.54 | 0.55 | 0.53 | 0.57 | 0.56 | 0.55 | 0.48 | 0.49 | 0.47 |
| a-45-2  | 0.29 | 0.3  | 0.27 | 0.67 | 0.67 | 0.63 | 0.98 | 1    | 0.99 | 0.54 | 0.34 | 0.61 | 0.42 | 0.44 | 0.46 | 0.56 | 0.58 | 0.55 | 0.58 | 0.57 | 0.56 | 0.45 | 0.48 | 0.5  |
| a-45-3  | 0.28 | 0.29 | 0.26 | 0.66 | 0.65 | 0.64 | 0.98 | 0.99 | 1    | 0.54 | 0.34 | 0.59 | 0.43 | 0.42 | 0.44 | 0.56 | 0.57 | 0.56 | 0.58 | 0.58 | 0.57 | 0.46 | 0.47 | 0.47 |
| a-90-1  | 0.69 | 0.7  | 0.66 | 0.71 | 0.72 | 0.73 | 0.6  | 0.54 | 0.54 | 1    | 0.81 | 0.92 | 0.61 | 0.59 | 0.56 | 0.7  | 0.71 | 0.7  | 0.71 | 0.71 | 0.72 | 0.78 | 0.74 | 0.69 |
| a-90-2  | 0.66 | 0.66 | 0.95 | 0.38 | 0.38 | 0.38 | 0.49 | 0.34 | 0.34 | 0.81 | 1    | 0.65 | 0.61 | 0.63 | 0.56 | 0.35 | 0.36 | 0.35 | 0.41 | 0.42 | 0.42 | 0.61 | 0.55 | 0.42 |
| a-90-3  | 0.54 | 0.55 | 0.5  | 0.81 | 0.81 | 0.78 | 0.62 | 0.61 | 0.59 | 0.92 | 0.65 | 1    | 0.54 | 0.55 | 0.54 | 0.74 | 0.76 | 0.72 | 0.77 | 0.73 | 0.75 | 0.77 | 0.79 | 0.79 |
| d-120-1 | 0.6  | 0.61 | 0.6  | 0.32 | 0.32 | 0.33 | 0.49 | 0.42 | 0.43 | 0.61 | 0.61 | 0.54 | 1    | 0.97 | 0.95 | 0.35 | 0.34 | 0.34 | 0.46 | 0.49 | 0.45 | 0.56 | 0.52 | 0.45 |
| d-120-2 | 0.66 | 0.67 | 0.65 | 0.32 | 0.32 | 0.3  | 0.51 | 0.44 | 0.42 | 0.59 | 0.63 | 0.55 | 0.97 | 1    | 0.97 | 0.33 | 0.32 | 0.31 | 0.43 | 0.44 | 0.41 | 0.54 | 0.53 | 0.46 |
| d-120-3 | 0.59 | 0.6  | 0.58 | 0.34 | 0.33 | 0.31 | 0.51 | 0.46 | 0.44 | 0.56 | 0.56 | 0.54 | 0.95 | 0.97 | 1    | 0.35 | 0.34 | 0.33 | 0.42 | 0.44 | 0.4  | 0.52 | 0.51 | 0.46 |
| d-15-1  | 0.23 | 0.24 | 0.2  | 0.83 | 0.83 | 0.84 | 0.54 | 0.56 | 0.56 | 0.7  | 0.35 | 0.74 | 0.35 | 0.33 | 0.35 | 1    | 0.98 | 0.99 | 0.82 | 0.8  | 0.81 | 0.64 | 0.65 | 0.67 |
| d-15-2  | 0.23 | 0.24 | 0.2  | 0.87 | 0.86 | 0.86 | 0.55 | 0.58 | 0.57 | 0.71 | 0.36 | 0.76 | 0.34 | 0.32 | 0.34 | 0.98 | 1    | 0.99 | 0.83 | 0.81 | 0.83 | 0.68 | 0.69 | 0.72 |
| d-15-3  | 0.22 | 0.23 | 0.19 | 0.83 | 0.82 | 0.84 | 0.53 | 0.55 | 0.56 | 0.7  | 0.35 | 0.72 | 0.34 | 0.31 | 0.33 | 0.99 | 0.99 | 1    | 0.81 | 0.8  | 0.82 | 0.65 | 0.64 | 0.66 |
| d-45-1  | 0.29 | 0.31 | 0.27 | 0.78 | 0.78 | 0.78 | 0.57 | 0.58 | 0.58 | 0.71 | 0.41 | 0.77 | 0.46 | 0.43 | 0.42 | 0.82 | 0.83 | 0.81 | 1    | 0.98 | 0.99 | 0.82 | 0.83 | 0.84 |
| d-45-2  | 0.3  | 0.31 | 0.28 | 0.74 | 0.74 | 0.75 | 0.56 | 0.57 | 0.58 | 0.71 | 0.42 | 0.73 | 0.49 | 0.44 | 0.44 | 0.8  | 0.81 | 0.8  | 0.98 | 1    | 0.99 | 0.82 | 0.8  | 0.81 |
| d-45-3  | 0.29 | 0.3  | 0.26 | 0.77 | 0.77 | 0.79 | 0.55 | 0.56 | 0.57 | 0.72 | 0.42 | 0.75 | 0.45 | 0.41 | 0.4  | 0.81 | 0.83 | 0.82 | 0.99 | 0.99 | 1    | 0.83 | 0.82 | 0.83 |
| d-90-1  | 0.51 | 0.52 | 0.49 | 0.71 | 0.72 | 0.73 | 0.48 | 0.45 | 0.46 | 0.78 | 0.61 | 0.77 | 0.56 | 0.54 | 0.52 | 0.64 | 0.68 | 0.65 | 0.82 | 0.82 | 0.83 | 1    | 0.97 | 0.94 |
| d-90-2  | 0.48 | 0.48 | 0.45 | 0.73 | 0.74 | 0.71 | 0.49 | 0.48 | 0.47 | 0.74 | 0.55 | 0.79 | 0.52 | 0.53 | 0.51 | 0.65 | 0.69 | 0.64 | 0.83 | 0.8  | 0.82 | 0.97 | 1    | 0.98 |
| d-90-3  | 0.34 | 0.35 | 0.31 | 0.78 | 0.78 | 0.75 | 0.47 | 0.5  | 0.47 | 0.69 | 0.42 | 0.79 | 0.45 | 0.46 | 0.46 | 0.67 | 0.72 | 0.66 | 0.84 | 0.81 | 0.83 | 0.94 | 0.98 | 1    |
| a-120-1 |      |      |      |      |      |      |      |      |      |      |      |      |      |      |      |      |      |      |      |      |      |      |      |      |
| a-120-2 |      |      |      |      |      |      |      |      |      |      |      |      |      |      |      |      |      |      |      |      |      |      |      |      |
| a-120-3 |      |      |      |      |      |      |      |      |      |      |      |      |      |      |      |      |      |      |      |      |      |      |      |      |
| a-15-1  |      |      |      |      |      |      |      |      |      |      |      |      |      |      |      |      |      |      |      |      |      |      |      |      |
| a-15-2  |      |      |      |      |      |      |      |      |      |      |      |      |      |      |      |      |      |      |      |      |      |      |      |      |
| a-15-3  |      |      |      |      |      |      |      |      |      |      |      |      |      |      |      |      |      |      |      |      |      |      |      |      |
| a-45-1  |      |      |      |      |      |      |      |      |      |      |      |      |      |      |      |      |      |      |      |      |      |      |      |      |
| a-45-2  |      |      |      |      |      |      |      |      |      |      |      |      |      |      |      |      |      |      |      |      |      |      |      |      |
| a-45-3  |      |      |      |      |      |      |      |      |      |      |      |      |      |      |      |      |      |      |      |      |      |      |      |      |
| a-90-1  |      |      |      |      |      |      |      |      |      |      |      |      |      |      |      |      |      |      |      |      |      |      |      |      |
| a-90-2  |      |      |      |      |      |      |      |      |      |      |      |      |      |      |      |      |      |      |      |      |      |      |      |      |
| a-90-3  |      |      |      |      |      |      |      |      |      |      |      |      |      |      |      |      |      |      |      |      |      |      |      |      |
| d-120-1 |      |      |      |      |      |      |      |      |      |      |      |      |      |      |      |      |      |      |      |      |      |      |      |      |
| d-120-2 |      |      |      |      |      |      |      |      |      |      |      |      |      |      |      |      |      |      |      |      |      |      |      |      |
| d-120-3 |      |      |      |      |      |      |      |      |      |      |      |      |      |      |      |      |      |      |      |      |      |      |      |      |
| d-15-1  |      |      |      |      |      |      |      |      |      |      |      |      |      |      |      |      |      |      |      |      |      |      |      |      |
| d-15-2  |      |      |      |      |      |      |      |      |      |      |      |      |      |      |      |      |      |      |      |      |      |      |      |      |
| d-15-3  |      |      |      |      |      |      |      |      |      |      |      |      |      |      |      |      |      |      |      |      |      |      |      |      |
| d-45-1  |      |      |      |      |      |      |      |      |      |      |      |      |      |      |      |      |      |      |      |      |      |      |      |      |
| d-45-2  |      |      |      |      |      |      |      |      |      |      |      |      |      |      |      |      |      |      |      |      |      |      |      |      |
| d-45-3  |      |      |      |      |      |      |      |      |      |      |      |      |      |      |      |      |      |      |      |      |      |      |      |      |
| d-90-1  |      |      |      |      |      |      |      |      |      |      |      |      |      |      |      |      |      |      |      |      |      |      |      |      |
| d-90-2  |      |      |      |      |      |      |      |      |      |      |      |      |      |      |      |      |      |      |      |      |      |      |      |      |
| d-90-3  |      |      |      |      |      |      |      |      |      |      |      |      |      |      |      |      |      |      |      |      |      |      |      |      |

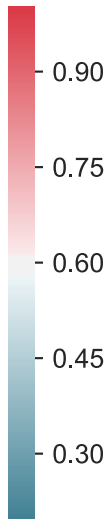

Supplement: s1 [file s1]

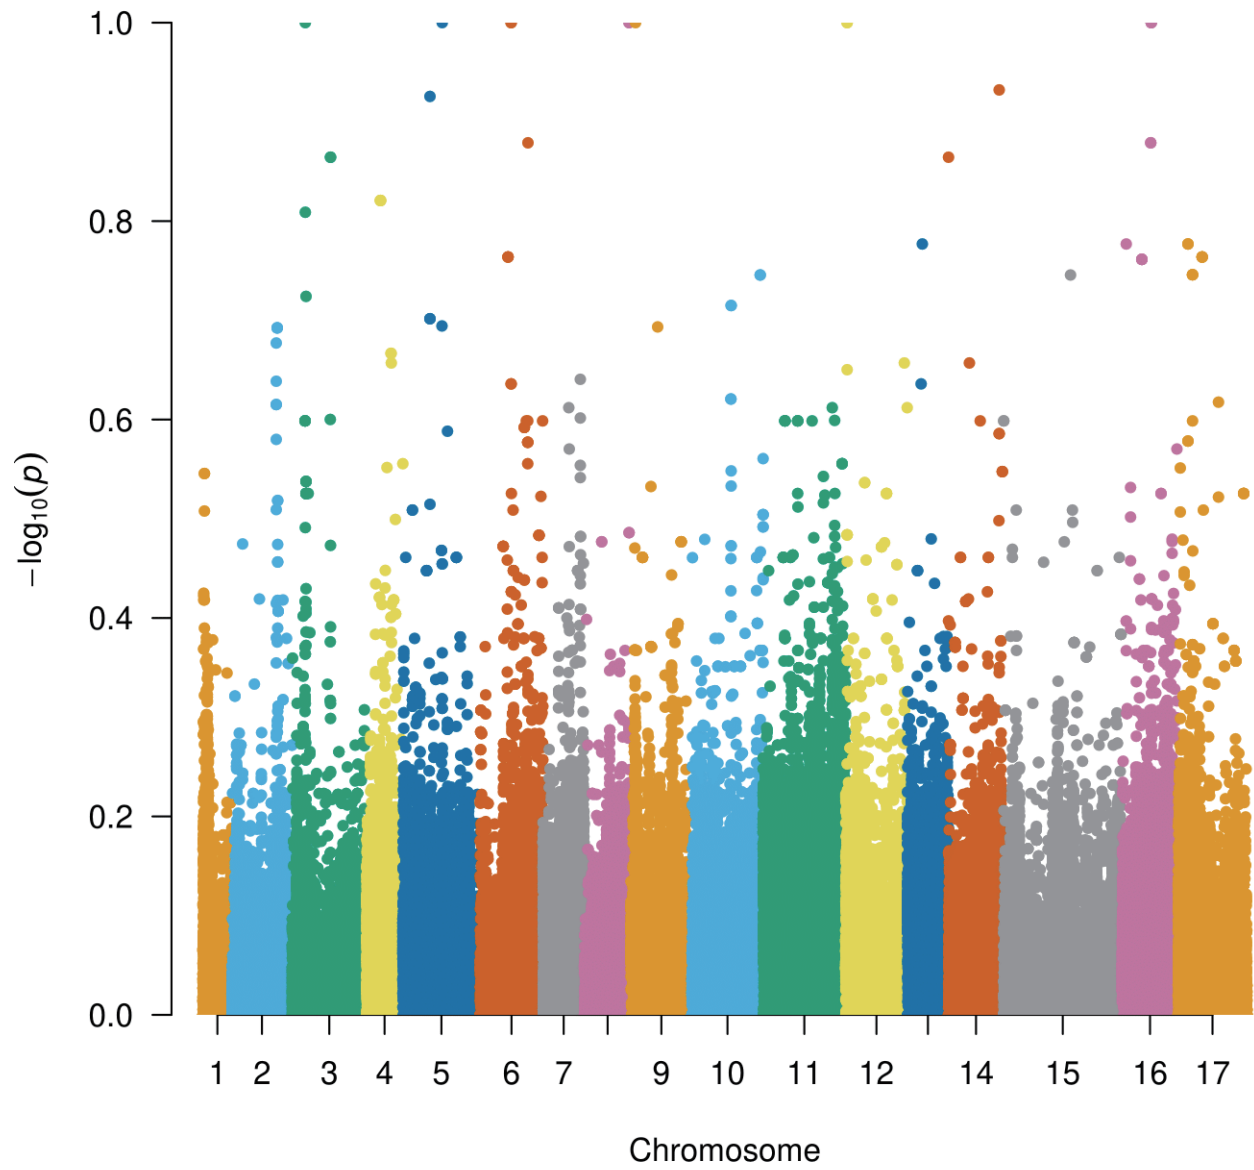

Supplement: s1 [file s1]

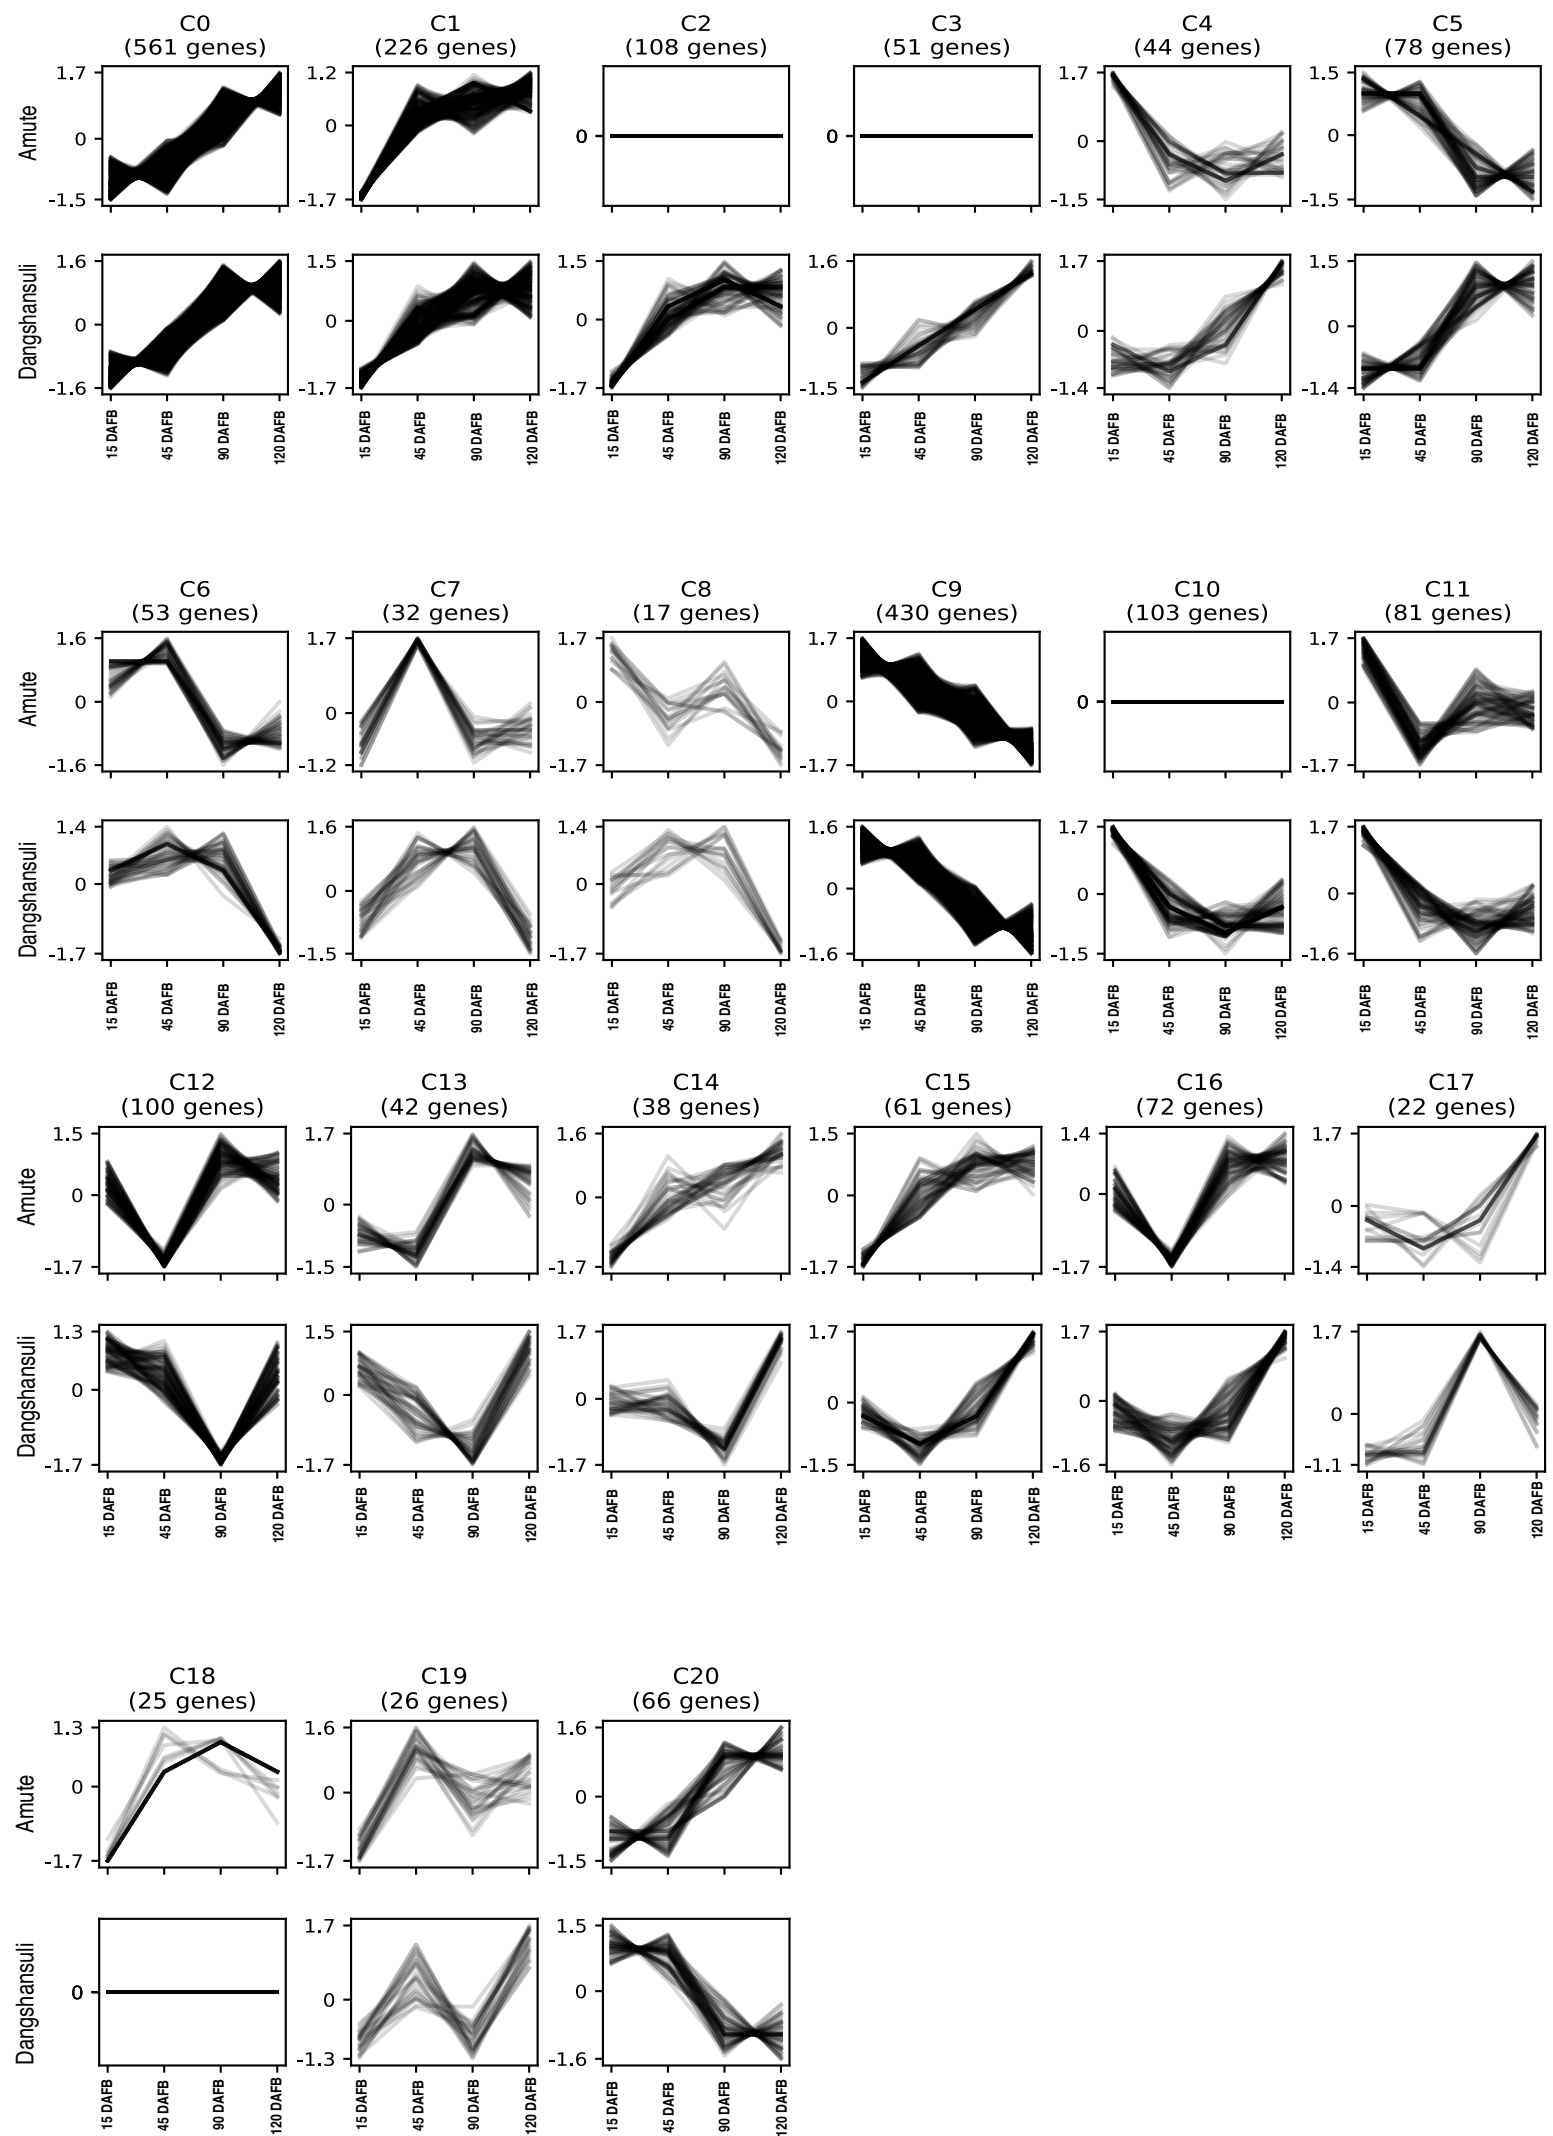

Supplement: s1 [file s1]

Amute

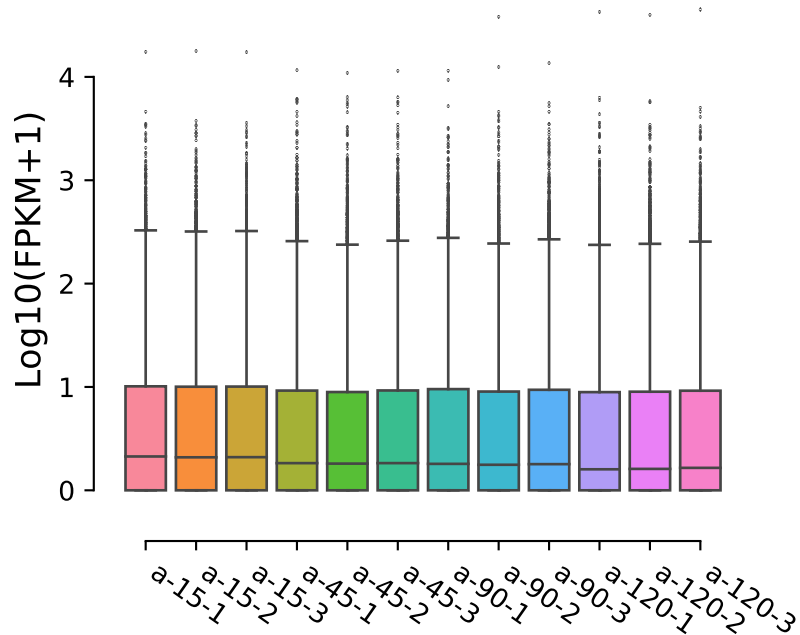

Dangshansuli

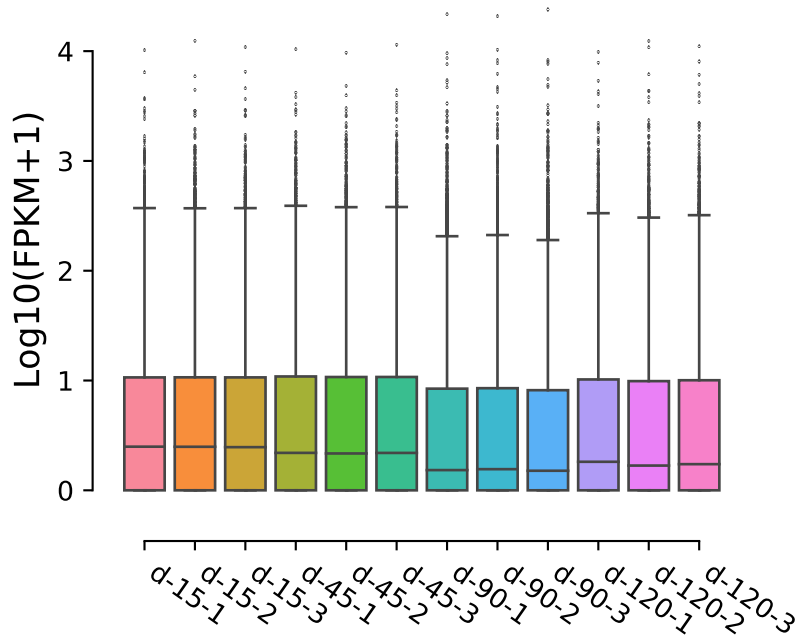

Supplement: s1 [file s1]
